# Supplementary material for: Elevated Levels of Mislocalised, Constitutive Ras Signalling Can Drive Quiescence by Uncoupling Cell-Cycle Regulation from Metabolic Homeostasis
Source: MDPI journal article supplement (doi:10.3390/biom13111619), 2023-11-06
Supplement: s1 [file s1]

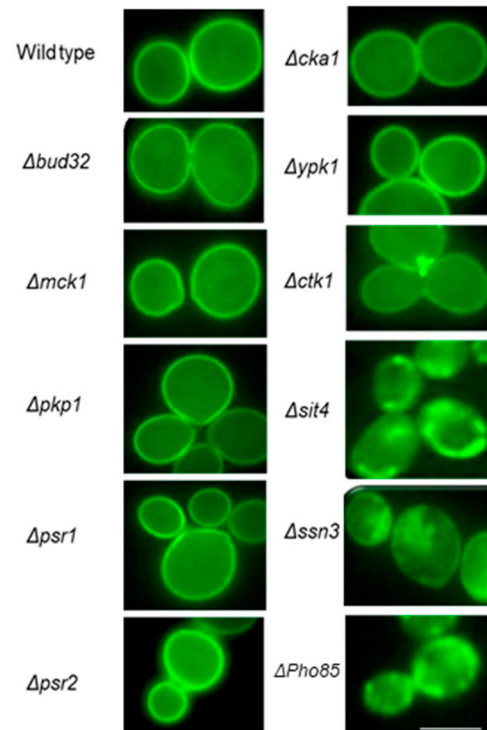

**Figure S1** – Wild type cells or cells deleted for a single gene as indicated were transformed with a plasmid expressing the active Ras probe, 2 x RBD-GFP. The cells were cultured in SD-URA media containing 2% glucose to select for the plasmid and sampled during log growth after inoculation. This experiment was repeated three times and a representative data set is shown. Size Bar = 5 $\mu$ m

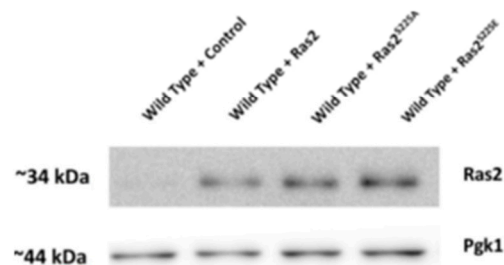

**Figure S2** -A Western blot showing the detection of Ras2p in cells overexpressing *RAS2*, *RAS2<sup>S225A</sup>*, *RAS2<sup>S225E</sup>* or containing an empty plasmid control (low copy, CEN). The cells were cultured in SD-URA media and sampled during stationary phase of growth 24 hours after inoculation. Uniform protein loading was ensured by probing levels of Pgk1 after probing for Ras2p. This experiment was repeated three times and a representative data set is shown.

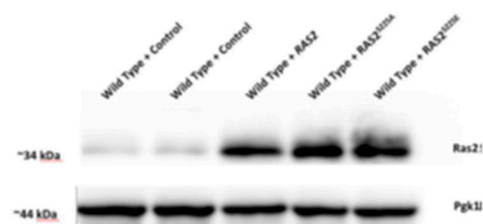

**Figure S3** - A Western blot showing the detection of Ras2p in cells overexpressing *RAS2*, *RAS2<sup>S225A</sup>*, *RAS2<sup>S225E</sup>* or containing an empty plasmid control (high copy, 2 $\mu$ ). The cells were cultured in SD-URA media and sampled during stationary phase of growth 24 hours after inoculation. Uniform protein loading was ensured by probing levels of Pgk1 after probing for Ras2p. This experiment was repeated three times and a representative data set is shown.

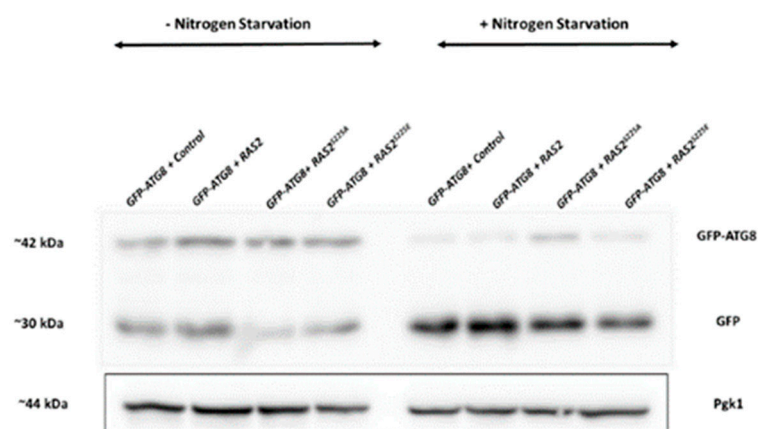

**Figure S4** - A western blot showing the detection of GFP in GFP-ATG8 cells overexpressing RAS2, RAS2S225A, RAS2S225E or containing an empty plasmid control. Cells were grown in SD -URA media for 24 hours. 1ml of culture was transferred to nitrogen starvation media to induce autophagy via nitrogen starvation and incubated at 30°C with 200 RPM shaking for 6 hours. Total protein was extracted from cells pre- and post-induction of autophagy and subjected to western blotting. To ensure uniform protein loading, the levels of Pgk1p were detected after probing for Ras2p. This experiment was repeated three times and a representative data set is shown.

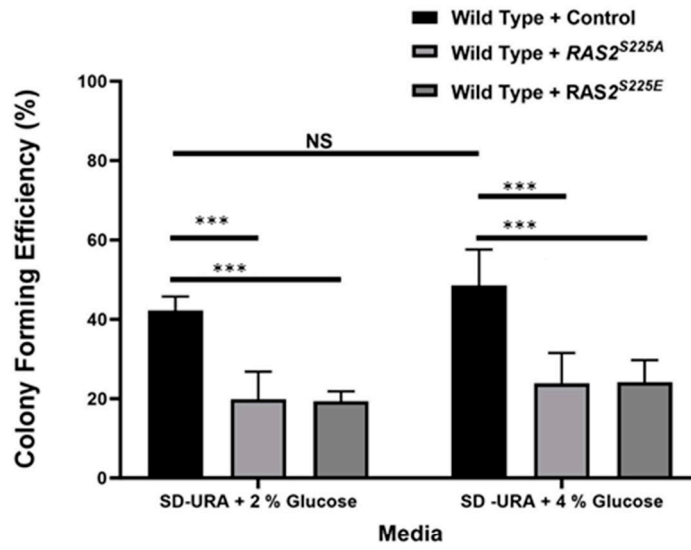

**Figure S5** – Wild type cells or cells overexpressing *RAS2*<sup>S225A</sup> or *RAS2*<sup>S225E</sup> were cultured in SD-URA media containing wither 2% or 4% glucose for 24 hours and assessed for colony forming efficiency as described within materials and methods. This experiment was repeated three times and error bars represent standard deviation. A One-way ANOVA using a Tukey multiple comparison test was used to determine statistical significance. Non-significant = NS, \*\*\* = adjusted p value  $\leq 0.001$

| Enzyme          | Description                                                                                                           | Ras2p phospho-peptide level in deletion strain | Identified sequence           |
|-----------------|-----------------------------------------------------------------------------------------------------------------------|------------------------------------------------|-------------------------------|
| YLR019W (PSR2)  | Plasma membrane phosphatase, involved in general stress response                                                      | 3.9 fold UP                                    | R.KMS*NAANGK.N                |
| YAR019C (CDC15) | Protein kinase of the mitotic exit network                                                                            | 1.7 fold UP                                    | R.KMS*NAANGK.N                |
| YGR262C (BUD32) | Protein kinase, required for tRNA modification                                                                        | Down 2.2                                       | R.KMS*NAANGK.N                |
| YIL035C (CKA1)  | Protein kinase, has a role in cell growth and proliferation                                                           | Down 2.2                                       | R.NAS*IES*<br>KTGLAGNQATNGK.T |
| YIL042C (PKP1)  | Mitochondrial protein kinase, involved in negative regulation of pyruvate dehydrogenase                               | Down 1.5                                       | R.NAS*IES*<br>KTGLAGNQATNGK.T |
| YLO10C (PSR1)   | Plasma membrane phosphatase, involved in general stress response                                                      | Down 3.1                                       | R.NAS*IES*<br>KTGLAGNQATNGK.T |
| YNL307C (MCK1)  | Protein kinase, involved in chromosome segregation, mitotic entry, genome stability                                   | Down 1.6                                       | R.NAS*IES*<br>KTGLAGNQATNGK.T |
| YPL042C (SSN3)  | Cyclin dependant protein kinase, involved in phosphorylation of RNA polymerase, and glucose repression                | 1.5 fold UP                                    | K.GSGANSVPRNS*<br>GGHR.K      |
| YDL047W (SIT4)  | Phosphatase, required for golgi to ER traffic, similar to human PP6                                                   | 1.6 fold UP                                    | K.NVNSS*<br>TTVVNAR.N         |
| YKL126W (YPK1)  | Protein kinase; phosphorylates flippase activator Fpk1p, homolog of mammalian kinase SGK                              | 1.6 fold UP                                    | K.NVNSS*<br>TTVVNAR.N         |
| YKL139W (CTK1)  | Catalytic subunit of C terminal domain kinase, similar to human CDK12                                                 | 1.7 fold UP                                    | K.NVNSS*<br>TTVVNAR.N         |
| YPL042C (SSN3)  | Cyclin dependant protein kinase, involved in phosphorylation of RNA polymerase, glucose repression                    | 2.4 fold UP                                    | K.NVNSS*<br>TTVVNAR.N         |
| YPL031C (PHO85) | Cyclin-dependent kinase, involved in cellular response to nutrient levels and environmental conditions and cell cycle | 1.6 fold UP                                    | R.NASIES*<br>KTGLAGNQA        |

**Table S1** – Phospho pep 2.0 output for kinases and phosphatases whose deletion led to a significant change in Ras2 peptide phosphorylation levels as detected by mass spectrometry (ref)

| ORF     | Gene  | Yeastmine GO term                                            |
|---------|-------|--------------------------------------------------------------|
| YAL067C | SEO1  | transmembrane transporter activity                           |
| YBL030C | PET9  | transmembrane transport                                      |
| YBL042C | FUI1  | transmembrane transporter activity                           |
| YBL042C | FUI1  | transmembrane transporter activity                           |
| YBR021W | FUR4  | transmembrane transporter activity                           |
| YBR068C | BAP2  | amino acid transmembrane transport                           |
| YBR069C | TAT1  | amino acid transmembrane transport                           |
| YCL038C | ATG22 | amino acid transmembrane export from vacuole                 |
| YCR023C |       | transmembrane transporter activity                           |
| YCR098C | GIT1  | glycerophosphodiester transmembrane transport                |
| YDL247W | MPH2  | transmembrane transporter activity                           |
| YDR046C | BAP3  | amino acid transmembrane transport                           |
| YER053C | PIC2  | copper ion transmembrane transport                           |
| YER056C | FCY2  | transmembrane transporter activity                           |
| YGL008C | PMA1  | proton export across plasma membrane                         |
| YGR281W | YOR1  | cadmium ion transmembrane transport                          |
| YGR289C | MAL11 | carbohydrate transmembrane transport                         |
| YHL040C | ARN1  | iron ion transmembrane transport                             |
| YHL047C | ARN2  | iron ion transmembrane transport                             |
| YHR051W | COX6  | proton transmembrane transport                               |
| YIL013C | PDR11 | transmembrane transport                                      |
| YJR095W | SFC1  | succinate transmembrane transport                            |
| YKR093W | PTR2  | dipeptide import across plasma membrane                      |
| YLL048C | YBT1  | transmembrane transport                                      |
| YLL061W | MMP1  | amino acid transmembrane transport                           |
| YLR004C | THI73 | transmembrane transporter activity                           |
| YLR038C | COX12 | proton transmembrane transport                               |
| YLR152C |       | transmembrane transport                                      |
| YLR214W | FRE1  | iron ion transmembrane transport                             |
| YLR220W | CCC1  | iron ion transmembrane transport                             |
| YMR241W | YHM2  | mitochondrial citrate transmembrane transport                |
| YNR055C | HOL1  | transmembrane transporter activity                           |
| YOL152W | FRE7  | iron ion transmembrane transport                             |
| YOR192C | THI72 | 5-amino-1-ribofuranosylimidazole-4-carboxamide transmembrane |
| YPL058C | PDR12 | organic acid transmembrane transport                         |
| YPL078C | ATP4  | proton transmembrane transport                               |
| YPL092W | SSU1  | transmembrane transport                                      |
| YPL221W | FLC1  | FAD transmembrane transport                                  |
| YPL265W | DIP5  | amino acid transmembrane transport                           |
| YPL274W | SAM3  | amino acid transmembrane transport                           |
| YPR156C | TPO3  | spermine transmembrane transport                             |

**Table S2** – Upregulated genes clustered to the transmembrane transporters function when transcriptomes of *RAS2<sup>S225A</sup>* and *Δcup9 RAS2<sup>S225A</sup>* cells were analysed by Yeastmine GO, P<0.0001

| GO term                                 | Enrichment P value | Genes within GO term                                                                                                                                                                                                                                                                     |
|-----------------------------------------|--------------------|------------------------------------------------------------------------------------------------------------------------------------------------------------------------------------------------------------------------------------------------------------------------------------------|
| cytoplasmic translation                 | 6.74E-08           | RPL19B RPL23A RPS14A RPL31A<br>RPP1B RPL41B RPL41A RPS18A<br>RPS24A RPL30 RPL24A RPL1B<br>RPL9A RPL26B RPL11B RPL42B<br>RPL34B RPL43B TMA19 TMA7<br>RPS28B RPS30A RPS25B RPS18B<br>RPL9B                                                                                                 |
| pyruvate metabolism                     | 2.39E-05           | ENO1 ENO2 ERR3 FBA1 GPM1 IRC7<br>PDA1 PDA1 PDC1 PGI1 PGK1 TDH1<br>TDH2 TDH3 TPI1                                                                                                                                                                                                         |
| glycolysis +<br>carbohydrate metabolism | 3.80E-05           | PGI1 PGM2 PGK1 PDA1 MAL32<br>MAL12 PGK1 TPI1 EXG2 PDA1<br>TDH1 TDH2 TDH3 ENO1 GUT1<br>ENO1 ENO2 GND1 YHR210C IMA1<br>IMA2 IMA5 GPM1 GPH1 FBA1<br>ERR3                                                                                                                                    |
| organic acid metabolism                 | 6.23E-04           | ETR1 PGI1 ARO4 HIS4 PGK1 ELO2<br>GLT1 LYS20 GCV1 TPI1 HOM2<br>ARG82 GCN4 HPA3 CEM1 PDA1<br>IRC7 GUS1 ADE6 VAS1 TDH3 ENO1<br>YHR020W ENO2 GND1 TDH1 URA2<br>TDH2 FBA1 GPM1 PDC1 SHM2<br>ASP3-3 ILV5 CYB2 ALD3 GCV2<br>GAD1 SNO4 ERR3 PYP1 LEU4 WRS1<br>LEU9 ORT1 GDH1 HSP33 HSP32<br>MRI1 |

**Table S3** – Upregulated genes clustered to the GO Process term by Yeastmine when transcriptomes of wild type and *Δcup9* cells were analysed

| GO term            | Enrichment<br>P value | Genes within GO term                                                                      |
|--------------------|-----------------------|-------------------------------------------------------------------------------------------|
| rRNA modification  | <0.05                 | BUD23 SNR82 SNR39B SNR32<br>SNR71 SNR3 SNR54 SNR76 SNR83<br>SNR86 SNR49 SNR81 SNR51 SNR70 |
| Sulphur metabolism | <0.05                 | CYS3 MET8 MET10 MET3 MET14<br>MET16                                                       |

**Table S4** – Downregulated genes clustered to the GO Process term by Yeastmine when transcriptomes of wild type and *Δcup9* cells were analysed
